# Supplementary material for: A Review of 2011 for PLoS Computational Biology
Source: PLoS Comput Biol. 2012 Jan 26;8(1):e1002387. doi: 10.1371/journal.pcbi.1002387 (PMC3266870; doi:10.1371/journal.pcbi.1002387)
Supplement: Table S1 — Guest Editors and reviewers for PLoS Computational Biology in 2011. (XLS) [file pcbi.1002387.s001.xls]

## Sheet: Table S1
PLoS Computational Biology's Guest Editors in 2011			PLoS Computational Biology's Peer Reviewers in 2011
Ad	Aertsen		Geoffrey	Abbott
Patrick	Aloy		Pia	Abel zur Wiesch
Gregoire	Altan-Bonnet		Christoph	Adami
Elena	Alvarez-Buylla		Tinri	Aegerter-Wilmsen
Brian	Baker		Markus	Affolter
Colin	Baker		Aric	Agmon
Nathan	Baker		Aneil	Agrawal
Albert-László	Barabási		Parvez	Ahammad
Emmanuel	Barillot		Niyaz	Ahmed
Geoffrey	Barton		Alaa	Ahmed
Niko	Beerenwinkel		Yong-Yeol	Ahn
Bonnie	Berger		Kenneth	Aizawa
Gustav	Bernroider		Frank	Alber
Bernd	Blasius		Mark	Alber
Maciej	Boni		Jan	Albert
Emery	Brown		Reka	Albert
Nicolas	Brunel		Kirill	Alexandrov
Rafael	Bruschweiler		Emil	Alexov
Nicolas	Buchler		Karen	Alim
Ed	Bullmore		Samuel	Alizon
Helen	Byrne		Andrew	Allen
Paolo	Carloni		Eric	Alm
Bruce	Carlson		Genevieve	Almouzni
Michele	Caselle		Patrick	Aloy
Arup	Chakraborty		Gregoire	Altan-Bonnet
Ashutosh	Chilkoti		Christian	Althaus
Kuo-Chen	Chou		Alexander	Altland
Andrew	Clark		Russ	Altman
Giorgio	Colombo		Luís	Amaral
Iain	Couzin		Bharath	Ananthasubramaniam
Stephen	Cringle		Costas	Anastassiou
Holk	Cruse		Dimitris	Anastassiou
Rhiju	Das		Mikael	Andersen
John	Dick		Alexander	Anderson
Nikolay	Dokholyan		Jean-Baptiste	André
David	Drummond		Isabelle	André
Yong	Duan		Ioan	Andricioaei
Rick	Durrett		Ioannis	Androulakis
Jan	Engelstädter		Thomas	Angelini
Will	Fairbrother		Kiyoko	Aoki-Kinoshita
Chunhai	Fan		Ruslan	Aphasizhev
Michael	Feig		Ehsan	Arabzadeh
David	Field		John	Archer
Ila	Fiete		Saul	Ares
Andras	Fiser		Gil	Ariel
James	Fowler		Davis	Arifin
Erik	Fransén		David	Arnosti
Martin	Fussenegger		Gaurav	Arya
Philippe	Gaussier		Becca	Asquith
Philip	Gerlee		Igor	Astsaturov
Richard	Goldstein		Andras	Aszodi
Ruben	Gonzalez		Chaitanya	Athale
Andrew	Goryachev		Canan	Atilgan
Darren	Green		Carter	Atkinson
Nick	Grishin		Bruno	Averbeck
Kevin	Hall		Yuval	Aviel
Oskar	Hallatschek		Ramy	Aziz
James R	Halpert		M. Madan	Babu
Shlomo	Havlin		Jaume	Bacardit
Robert	Hazen		Albino	Bacolla
Charlotte	Hemelrijk		Joel	Bader
Joachim	Hermisson		Gary	Bader
Walter	Herzog		Jonathan	Badger
Gerhard	Hummer		Marc	Baguelin
Fumiya	Iida		Yawen	Bai
Joanne	Ingwall		Vladimir	Bajic
Robert	Jernigan		Ahmet	Bakan
Natarajan	Kannan		Ruth	Baker
Amy	Keating		David	Baker
Daniel	Kersten		Barbara	Bakker
Can	Kesmir		Robert	Balaban
Marek	Kimmel		Gabor	Balazsi
Natalia	Komarova		Sébastien	Ballesteros
Roger	Kouyos		Rudi	Balling
Nikolaus	Kriegeskorte		Nuno	Bandeira
Edo	Kussell		Peter	Bandettini
Hilal	Lashuel		Sourav	Bandyopadhyay
Albert	Lau		Sanghamitra	Bandyopadhyay
Thomas	Leitner		Shweta	Bansal
Doron	Levy		Fernando	Baquero
Yong	Li		Yoseph	Barash
Olivier	Lichtarge		Kenneth	Barbee
Jennifer	Lippincott-Schwartz		Alessandro	Barducci
Mickey	London		Izhar	Bar-Gad
Jinhu	Lu		Ziv	Bar-Joseph
David	Lubensky		Riccardo	Baron
Ray	Luo		Tim	Barraclough
Andrei	Lupas		Jose	Barral
Alexander	MacKerell Jr		Adam	Barrett
Joah	Madden		Xavier	Barril
Pierre	Magistretti		Caswell	Barry
Mario	Marchisio		Daniel	Barsky
Daniele	Marinazzo		Zoltan	Barta
Roy	Mariuzza		Frederic	Bartumeus
Michael	Milham		Josep	Bassaganya-Riera
Atte	Moilanen		Danielle	Bassett
Alexandre	Morozov		Ugo	Bastolla
Sayan	Mukherjee		Paul	Bates
Viktor	Müller		Peter	Battaglia
Eugene	Myers		Chris	Bauch
Richard	Neher		Jean	Baum
Michael	Nilges		Andreas	Baur
Lucila	Ohno-Machado		Maxim	Bazhenov
Richard	Pastor		Jason	Bazil
Stephen	Payne		Daniel	Beard
Christopher	Pearson		Rachel	Bearon
William	Pearson		John	Bechhoefer
Rolf	Pfeifer		Scott	Becker
Thomas	Pfeiffer		Michael	Beer
Gary	Pielak		Niko	Beerenwinkel
Andrew	Pohorille		Bastian	Beggel
Michael	Poirier		Marcelo	Behar
Jonathan	Pritchard		Robert	Beiko
Andrew	Read		Philip	Bejon
Aviv	Regev		Michaël	Bekaert
Roland	Regoes		Stefan	Bekiranov
Marylyn	Ritchie		Richard	Belew
David	Robertson		Jeremy	Bellay
Pejman	Rohani		Pedro	Beltrao
Remo	Rohs		Frida	Ben-Ami
Christoph	Schreiner		Jan	Benda
Ora	Schueler-Furman		Matthew	Bendall
Daniel	Segrè		Kobi	Benenson
Dirk	Semmann		Simon	Benhamou
Peggy	Series		Asa	Ben-Hur
Joan-Emma	Shea		Eshel	Ben-Jacob
Steve	Smith		Yuval	Benjamini
Orkun	Soyer		Kristen	Bennett
Jorg	Stelling		Matthew	Bennett
David	Stephens		Mikael	Benson
Matthew	Stephens		Nir	Ben-Tal
Cédric	Sueur		Sivan	Bercovici
Dave	Thirumalai		Philipp	Berens
Arne	Traulsen		Stephen	Beres
Matthew	Tresch		Igor	Berezovsky
Alexander	Tropsha		Johannes	Berg
Ruben	Valas		Casey	Bergman
Pedro	Valdes-Sosa		Sven	Bergmann
Mark	van Rossum		Pietro	Berkes
Brian	Volkman		Max	Berniker
Rüdiger	Wehner		Philipp	Berninger
Harel	Weinstein		Bastien	Berret
W	Wilbur		Hugues	Berry
David	Willshaw		Ivan	Bertoncello
Tal	Yarkoni		Paul	Bertone
Jasmine	Zhou		Robert	Best
			Doron	Betel
			Matthias	Bethge
			Jack	Beusmans
			David	Beveridge
			Andreas	Beyer
			Daniela	Bezemer
			Upinder	Bhalla
			Andrew	Biewener
			Philip	Biggin
			Marom	Bikson
			Peter	Billingsley
			Vincent	Billock
			Marc	Birtwistle
			Shyam	Biswal
			Kim	Blackwell
			David R	Blair
			Judith	Blake
			Leonidas	Bleris
			Gunnar	Blohm
			Anders	Blomberg
			Jesse	Bloom
			Christoph	Bock
			Alistair	Boettiger
			Rafal	Bogacz
			Gilbert	bogle
			Ingo	Bojak
			Ben	Bolker
			Hamid	Bolouri
			Evan	Bolton
			Richard	Bonneau
			Susan	Bonner-Weir
			Martin	Bootsma
			José	Borghans
			Peter	Bossaerts
			Gregory	Bowman
			Ivana	Bozic
			Rogier	Braakman
			Philip	Bradley
			Patrick	Bradley
			Tiago	Branco
			Daniel	Braun
			Dennis	Bray
			Michael	Breakspear
			Björn	Brembs
			Naama	Brenner
			Steven	Bressler
			Romain	Brette
			Vladimir	Brezina
			James	Briggs
			Steven	Britton
			William	Brock
			Gordon	Broderick
			Natasja	Brooijmans
			Charles	Brooks, III
			Jürgen	Brosius
			Michael	Brown
			Emery	Brown
			Steven	Brown
			Andrew	Browning
			John	Brownstein
			Robijn	Bruinsma
			Nicolas	Brunel
			Randy	Bruno
			Mark	Brynildsen
			Kevin	Bryson
			Dongbo	Bu
			Vanni	Bucci
			Dorothy	Buck
			Markus	Buehler
			Larry	Bull
			Ed	Bullmore
			Yoram	Burak
			Etienne	Burdet
			Johannes	Burge
			Neil	Burgess
			Robin	Bush
			Frederic	Bushman
			Atul	Butte
			Helen	Byrne
			Kerstin	Bystricky
			Chris	Bystroff
			Joana	Cabral
			Charles	Cadieu
			Hayriye	Cagnan
			James	Cai
			Stuart	Cain
			Tunahan	Cakir
			Vince	Calhoun
			Shawn	Campagna
			Stuart	Campbell
			Kenneth	Campbell
			Monica	Campillos
			Claire	Camus
			Carmen	Canavier
			Mario	Cannataro
			Robert	Cannon
			Ryan	Canolty
			J. Gregory	Caporaso
			John	Capra
			Vincent	Carey
			Örjan	Carlborg
			Teresa	Carlomagno
			Heather	Carlson
			Jonathan	Carlson
			Piero	Carninci
			Aura	Carreira
			Gregory	Carter
			Marta	Cascante
			Michele	Caselle
			John	Cass
			Stijn	Cassenaer
			Simon	Cauchemez
			Claudio	Cavasotto
			Franco	Celada
			Yana	Cen
			José	Chacón
			Maurice	Chacron
			Arup	Chakraborty
			Cliburn	Chan
			Mark	Chance
			Fiona	Chandra
			Chia-en	Chang
			mark	changizi
			Claudine	Chaouiya
			Mark	Chaplain
			Annita	Charalambous
			Larry	Chasin
			Arvind	Chavali
			Tomas E	Cheatham
			Iain	Cheeseman
			Mark	Chen
			Luonan	Chen
			Liang	Chen
			Jake	Chen
			Haifeng	Chen
			Xiaodong	Chen
			Jianhan	Chen
			Hong-Ming	Chen
			Yao	Chen
			Thierry	Cheutin
			Shu	Chien
			Christinah	Chiyaka
			John	Chodera
			Tom	Chou
			Kuo-Chen	Chou
			Debashish	Chowdhury
			Carlton	Chu
			Hyonho	Chun
			Wen-Yu	Chung
			Thomas	Churcher
			Christopher	Chute
			Francesca	Ciccarelli
			Andrea	Ciliberto
			Olivier	Cinquin
			Colleen	Clancy
			David	Clarke
			Neil	Clarke
			Claudia	Clopath
			G. Marius	Clore
			Sarah	Cobey
			Ruben	Coen-Cagli
			Jacques	Colinge
			Vittoria	Colizza
			Matthew	Collett
			James	Collins
			Giorgio	Colombo
			Albert	Compte
			Erik	Cook
			Kevin	Coombes
			Daniel	Coombs
			Graham	Coop
			Ben	Cooper
			William	Copeland
			Davide	Cora
			Jacques	Corbeil
			Jacob	Corn
			Athel	Cornish-Bowden
			Francis	Corson
			Michael	Cortez
			Rosa	Cossart
			Francisco	Couto
			Iain	Couzin
			Markus	Covert
			Jack	Cowan
			Matt	Cowperthwaite
			Jürgen	Cox
			Steven	Cox
			David	Cox
			Cameron	Craddock
			Dana	Crawford
			Molly	Crockett
			Anton	Crombach
			Fred	Cross
			Peter	Csermely
			Attila	Csikász-Nagy
			Meng	Cui
			Qiang	Cui
			Hermann	Cuntz
			Rhodri	Cusack
			Eric	Cytrynbaum
			Volker	Dürr
			Andreas	Daffertshofer
			Harel	Dahari
			Vasilis	Dakos
			Sasha	Dall
			Jessica	Damoiseaux
			Yang	Dan
			Andrea	Danani
			Thomas	Dandekar
			Egidio	D'Angelo
			Frederic	Danion
			Ranjan	Dash
			Madhukar	Dasika
			Andrea	d'Avella
			Stephen	David
			Olivier	David
			Todd	Davis
			Sean	Davis
			Ramana	Davuluri
			Rob	De Boer
			Alain	de Cheveigne
			Valerie	de Crécy-Lagard
			Nando	de Freitas
			Chris	de Graaf
			Xavier	de la Cruz
			Victor	de Lafuente
			Javier	De Las Rivas
			Joao	de Magalhaes
			Gonzalo	de Polavieja
			Hannelore	De Silva
			Alfonso	De Simone
			Fabrizio	De Vico Fallani
			Charlotte	Deane
			Dominique	Debanne
			Gustavo	Deco
			Eric	Deeds
			Michael	Deem
			Annick	Dejaegere
			Antonio	del Sol
			Marc	Delarue
			Daniele	Dell'Orco
			Ricardo	DeMarco
			Sophie	Deneve
			Michael	Denker
			France	Denoeud
			Jachen	Denoth
			Nancy	Denslow
			Rahul	Deo
			Juan	DePablo
			Philippe	Derreumaux
			Niraj	Desai
			Todd	DeSantis
			Erik	DeSchutter
			Markus	Deserno
			Gopikrishna	Deshpande
			Andreas	Deutsch
			Michael	DeWeese
			Chris	DeZeeuw
			Patrik	D'haeseleer
			Diego	Di Bernardo
			Attillio	Di Pietro
			Kamran	Diba
			James	DiCarlo
			Brad	Dickerson
			Xavier	Didelot
			Odo	Diekmann
			Christopher	DiMattina
			Feng	Ding
			David	Dingli
			Jochen	Ditterich
			Narendra	Dixit
			Olaf	Doessel
			Brent	Doiron
			Nikolay	Dokholyan
			Tomislav	Domazet-Loso
			Brian	Dominy
			Opher	Donchin
			Reik	Donner
			Nico	Dosenbach
			Robin	Dowell
			Thomas	Down
			Kenji	Doya
			John	Drake
			Dirk	Drasdo
			Michael	Dresser
			Jakob	Dreyer
			Ron	Dror
			Yong	Duan
			Joel	Dudley
			Emrah	Duezel
			Ken	Duffy
			Roland	Dunbrack
			Chris	Dupont
			Geneviève	Dupont
			Richard	Durbin
			Rick	Durrett
			Jonathan	Dushoff
			Rhonda	Dzakpasu
			Petras	Dzeja
			Oliver	Ebenhoeh
			Gerhard	Ecker
			Uri	Eden
			Olle	Edholm
			W. John	Edmunds
			Matthew	Egbert
			Ian	Ehrenreich
			Andrée	Ehresmann
			Lee	Eiden
			Wolfgang	Einhaeuser
			Jonathan	Eisen
			Eli	Eisenberg
			David	Eisenberg
			Frank	Eisenhaber
			Kim	Ekroos
			Meriem	el Karoui
			Adrian	Elcock
			Nels	Elde
			Marjet	Elemans
			Marie	Elliot
			Mark	Elliott
			Arne	Elofsson
			Marcus	Elstner
			Timothy	Elston
			Frank	Emmert-Streib
			Heiko	Enderling
			Jeffrey	Engelman
			Jan	Engelstädter
			Bernhard	Englitz
			Bard	Ermentrout
			Jason	Ernst
			Eleazar	Eskin
			Carlos	Espinosa-Soto
			Manel	Esteller
			Neil	Evans
			Laurent	Excoffier
			Eduardo	Eyras
			James	Faeder
			Manfred	Fahle
			Will	Fairbrother
			Adrienne	Fairhall
			Francesco	Falciani
			Martin	Falcke
			Joseph	Falke
			Paul	Falkowski
			Roland	Faller
			Hai	Fang
			Leon	Farhy
			Geoffrey	Faulkner
			Philippe	Faure
			Karoline	Faust
			Michael	Feig
			Andrew	Feig
			Adam	Feist
			Magdalena	Feldhahn
			Dirk	Feldmeyer
			Flavio	Fenton
			Guy	Fernald
			Stefano	Ferraina
			Matthew	Ferrari
			James	Ferrell
			Silvano	Ferrini
			Jennifer	Fewell
			Domonic	Ffytche
			David	Field
			Mark	Field
			Ila	Fiete
			Marc Thilo	Figge
			Marta	Filizola
			Jozsef	Fiser
			Daniel	Fisher
			Sarel	Fleishman
			Ronan	Fleming
			Lee	Fleming
			Rãzvan	Florian
			Anthony	Fodor
			Friedrich	Foerster
			Aaron	Fogelson
			Matthieu	Foll
			Walter	Fontana
			Jose	Fontanari
			Jasmine	Foo
			Daniel	Forger
			Christian	Forst
			Dean	Foster
			Ron	Fox
			John J.	Foxe
			Ernest	Fraenkel
			Paul	Francois
			Till	Frank
			Michael	Frank
			Martin	Frank
			Jeffrey	Fredberg
			Michael	French
			Erwin	Frey
			Robert	Friedman
			Jason	Friedman
			Arnoldo	Frigessi
			Dmitrij	Frishman
			Karl	Friston
			Simon	Frost
			Helen	Fryer
			Ernesto	Fuentes
			Wataru	Fujibuchi
			Tomoki	Fukai
			Satoshi	Fukuchi
			Sebastian	Funk
			Terrence	Furey
			Hiro	Furukawa
			Stefano	Fusi
			Matthias	Futschik
			Fabrizio	Gabbiani
			Chris	Gaiteri
			Jack	Gallant
			Giuseppe	Gallone
			Monique	Gangloff
			Vitaly	Ganusov
			Yi-Qin	Gao
			Eric	Garcia
			Jordi	Garcia-Ojalvo
			Margaret	Gardel
			Timothy	Gardner
			Karen	Garrett
			Sergey	Gavrilets
			Tomáš	Gedeon
			Maria	Geffen
			Caroline	Geisler
			Sergei	Gepshtein
			Mark	Gerstein
			Wulfram	Gerstner
			Robert	Gerszten
			Wayne	Getz
			Marc-Oliver	Gewaltig
			Daniel	Gewirth
			Cheol-Min	Ghim
			Atiyeh	Ghoreyshi
			Geoffrey	Ghose
			Stephano	Gianni
			Irene	Giardina
			Stan	Gielen
			Wayne	Giles
			Patrick	Gill
			George	Gillies
			Matthieu	Gilson
			Mario	Gimona
			Francesco	Ginelli
			Lisa	Giocomo
			Alejandro	Giorgetti
			Anne-Lise	Giraud
			Jean-Antoine	Girault
			Michele	Giugliano
			Alessandro	Giuliani
			Kimberly	Glass
			Robb	Glenny
			Tilmann	Glimm
			Greg	Gloor
			John	Gloster
			Bruce	Gluckman
			S	Gnanakaran
			Christophe	Godin
			Adam	Godzik
			Lea	Goentoro
			Paul	Gokhale
			Chaitanya	Gokhale
			Joshua	Goldberg
			Ido	Golding
			Michael	Goldman
			Richard	Goldstein
			Ramin	Golestanian
			David	Golomb
			Shawn	Gomez
			Graciela	Gonzalez
			Aitor	Gonzalez
			Fernando	Gonzalez-Candelas
			Geoffrey	Goodhill
			Holly	Goodson
			Uri	Gophna
			Alemayehu	Gorfe
			Olga	Gorlova
			Andrew	Goryachev
			Sara	Gosline
			Fred	Gould
			Nir	Gov
			Sidhartha	Goyal
			Bruce	Graham
			Christine	Granier
			Barry	Grant
			Michael	Graupner
			Frederik	Graw
			Joe W.	Gray
			David	Green
			Nigel	Greene
			Henry	Greenside
			Christian	Griesinger
			William	Griffiths
			Nick	Grishin
			Claudius	Gros
			Alan	Grossfield
			Christian	Gruber
			Marcel	Grunert
			Niklaus	Grunwald
			Zhenglong	Gu
			Xun	Gu
			Yongtao	Guan
			Raphael	Guerois
			Francois	Guilhot
			Javier	Guitian
			Anthony	Gummer
			Jeremy	Gunawardena
			Kris	Gunsalus
			Attila	Gursoy
			David	Gurwitz
			Reinhard	Guthke
			Maximilan	Haeussler
			Ziad	Hafed
			Matthew	Hahn
			Juergen	Hahn
			Richard	Hahnloser
			Adrian	Haith
			Vincent	Hakim
			Turkan	Haliloglu
			Oskar	Hallatschek
			Timothy	Hallett
			Donald	Hamelberg
			Michal	Hammel
			Daniel	Hammer
			Leendert	Hamoen
			Jing-Dong	Han
			William	Hanage
			William	Hancock
			John	Hancock
			Andreas	Handel
			Sridhar	Hannenhalli
			Nan	Hao
			Ross	Hardison
			Wade	Harper
			Heather	Harrington
			Alexander	Hartemink
			Niall	Haslam
			Robert	Haslinger
			Joachim	Hass
			Michael	Hasselmo
			Artemis	Hatzigeorgiou
			Vassily	Hatzimanikatis
			Peik	Haugen
			Sampsa	Hautaniemi
			Ian S	Haworth
			Michael	Hawrylycz
			Yoshinori	Hayakawa
			Satoru	Hayasaka
			Shigehiko	Hayashi
			John-Dylan	Haynes
			Gerald	Hazelbauer
			Yong	He
			Biyu	He
			Teresa	Head-Gordon
			Michael	Hecht
			Marcus	Heisler
			Sebastien	Helie
			Tomas	Helikar
			Christopher	Henry
			Michael	Henson
			Lance	Hepler
			Joshua	Herbeck
			Alan	Herbert
			Jean-Karim	Heriche
			Jaap	Heringa
			Héctor	Herranz
			Eva	Herrmann
			John	Hertz
			Tomer	Hertz
			John	Hertz
			Ralf	Herwig
			Andreas	Herz
			Hanspeter	Herzel
			Paul	Hibbard
			Desmond	Higham
			Lawrence	Hightower
			Hanno	Hildenbrandt
			Andreas	Hilfinger
			Kent	Hill
			Sara	Hillenmeyer
			Vincent	Hilser
			Peter	Hinow
			Lynette	Hirschman
			Jonathan	Hirst
			Chris	Hittinger
			Martin	Hjortsø
			Shing	Ho
			Sean	Hoban
			Philip	Hodgkin
			Thomas	Hoefer
			Thomas	Hofer
			Alexander	Hoffman
			Alexander	Hoffmann
			John	Hogenesch
			David	Holcman
			Marc	Holderied
			T Deirdre	Hollingsworth
			Liisa	Holm
			Ian	Holmes
			Jeffrey	Holmes
			Christopher	Honey
			Sungho	Hong
			Andrew	Hopkins
			Adam	Hoppe
			Katsuhisa	Horimoto
			David	Horn
			James	Horn
			Paul	Horton
			Steve	Horvath
			Rita	Horvath
			Barry	Horwitz
			Conor	Houghton
			James	Houk
			Thomas	House
			Jon	Houtman
			Martin	Howard
			Peter	Hraber
			Tzu-Hung	Hsiao
			Chun-Nan	Hsu
			Niu	Huang
			Erich	Huang
			Liang-Tsung	Huang
			Kerwyn	Huang
			Wolfgang	Huber
			Thomas	Huber
			Ramon	Huerta
			Lars	Hufnagel
			Sylvie	Huijben
			Duncan	Hull
			Martin	Humphries
			Mark	Humphries
			Thomas	Hund
			Laurence	Hunt
			Dirk	Husmeier
			Curtis	Huttenhower
			Quentin	Huys
			Changbong	Hyeon
			Ollivier	Hyrien
			Lilia	Iakoucheva
			Trey	Ideker
			Marianthi	Ierapetritou
			Pablo	Iglesias
			Oleg	Igoshin
			Robert	Insall
			Francesco	Iorio
			Ivan	Iossifov
			Amelia	Ireland
			Akio	Ishiguro
			Shuji	Ishihara
			Keita	Ito
			Vladimir	Itskov
			Ivaylo	Ivanov
			Richard	Ivry
			Yoh	Iwasa
			Jesús Antonio	Izaguirre
			John	Jack
			Vincent	Jacob
			Armand	Jacobs
			Donald	Jacobs
			Anders	Jacobsen
			Matthew	Jacobson
			Dieter	Jaeger
			Johannes	Jaeger
			Kevin	Janes
			Sarath	Janga
			Edward	Jarroll
			Bernard	Jasmin
			Mehrdad	Jazayeri
			Saad	Jbabdi
			K.T.	Jeang
			Anil	Jegga
			Per	Jemth
			Jeroen	Jeneson
			Oliver	Jensen
			Lars	Jensen
			Robert	Jernigan
			Buhl	Jerome
			Hongkai	Ji
			Hualiang	Jiang
			Viktor	Jirsa
			Junghyo	Jo
			Kenneth	Johnson
			Alan	Johnston
			Renaud	Jolivet
			Renaud	Jolivet
			Raja	Jothi
			Igor	Jurisca
			Igor	Jurisica
			William	Jusko
			Mads	Kærn
			Lars	Kaderali
			Marcus	Kaiser
			Sundeep	Kalantry
			Christoph	Kaleta
			Olga	Kalinina
			Roger	Kamm
			Christel	Kamp
			Hideki	Kandori
			Maricel	Kann
			Tommy	Kaplan
			Bert	Kappen
			Emmanouil	Karagiannis
			A	Kardamakis
			Anis	Karimpour-Fard
			Alain	Karma
			Peter	Karp
			Kevin	Karplus
			Robert	Kass
			William	Kath
			Aris	Katzourakis
			Mehdi	Kaytoue
			Uri	Keich
			Yogeshwar	Kelkar
			Thomas	Keller
			Laurent	Keller
			Ryan	Kelly
			Thomas	Kepler
			Ozlem	Keskin
			Can	Kesmir
			Philipp	Khaitovich
			Andre	Khalil
			Aly	Khan
			Sagar	Khare
			Purvesh	Khatri
			Alvin	Kho
			Abel	Kho
			Yury	Khudyakov
			Akinori	Kidera
			Stefan	Kiebel
			Andrzej	Kierzek
			Andrzej	Kierzek
			Daisuke	Kihara
			Gerry	Killeen
			Yoo-Ah	Kim
			Sun	Kim
			Philip	Kim
			Peter	Kim
			Youngchan	Kim
			Sanguk	Kim
			James	Kindt
			Carl	Kingsford
			Frank	Kirchhoff
			Thomas	Kirkwood
			Denise	Kirschner
			Jessica	Kissinger
			Hiroaki	Kitano
			Shigeru	Kitazawa
			Manfred	Kitzbichler
			Katsuyuki	Kiura
			Steffen	Klamt
			Gunnar	Klau
			Eili	Klein
			Allon	Klein
			Judith	Klein-Seetharaman
			Petra	Klepac
			Rachel	Klevit
			Dmitri	Klimov
			Ursula	Klingmueller
			Edda	Klipp
			Andrzej	Kloczkowski
			Stefan	Knapp
			Rob	Knight
			Volker	Knoop
			Jaroslav	Koca
			Ina	Koch
			Jacob	Koella
			Katia	Koelle
			Peter	Koenig
			Constantianus	Koenraadt
			Markus	Kollmann
			David	Komander
			Dmitry	Kondrashov
			Alexey	Kondrashov
			Renate	Konig
			Bob	Kooi
			Eugene	Koonin
			Cornelia	Kopp-Scheinpflug
			Juan	Korenbrot
			Alexandr	Kornev
			Gyorgy	Korniss
			Kirill	Korolev
			Tanja	Kortemme
			Klemen	Koselj
			Andrej	Kosmrlj
			Lubomir	Kostal
			Dennis	Kostka
			Hidehito	Kotani
			Roger	Kouyos
			Mehmet	Koyutürk
			Alexay	Kozhevnikov
			Rudiger	Krahe
			John	Krakauer
			Mark	Kramer
			Andres	Kriete
			J	Krishnan
			Nevan	Krogan
			Trine	Krogh-Madsen
			Leonid	Kruglyak
			Martin	Krupa
			Ruben	Kubiak
			Ellen	Kuhl
			Brian	Kuhlman
			Leslie	Kuhn
			Paul	Kulesa
			Rahul	Kulkarni
			Arvind	Kumar
			Ursula	Kummer
			Ádám	Kun
			Hiroyuki	Kurata
			Edo	Kussell
			Jason	Kutch
			Alexey	Kuznetsov
			Joachim	Lübke
			Michael	Laessig
			Harri	Lahdesmaki
			Christian	Landry
			Michael	Landy
			Oliver	Lange
			Morgan	Langille
			Daniel	Larson
			Keren	Lasker
			Michael	Lassig
			Richard	Lathrop
			Hakwan	Lau
			Douglas	Lauffenburger
			Paul	Laurienti
			Michael	Lawrence
			Matthew	Lazzara
			Nicolas	Le Novère
			Arthur	Leblois
			Jong Min	Lee
			Insuk	Lee
			Su-In	Lee
			Robert	Lee
			Andrew	Lee
			Jeffrey	Leek
			Elliot	Lefkowitz
			Ben	Lehner
			Hong	Lei
			Xie	Lei
			Thomas	Leitner
			Jean-Christophe	Leloup
			Philippe	Lemey
			Ihor	Lemischka
			Gareth	Leng
			Máté	Lengyel
			Boris	Lenhard
			Thomas	Lenormand
			Peter	Lenz
			Kalet	Leon
			Nathan	Lepora
			Alexander	Lerchner
			Christina	Leslie
			Justin	Lessler
			Gabriel	Leventhal
			Herbert	Levine
			Yaakov	Levy
			Randy	Lewis
			Bryan	Lewis
			Fran	Lewitter
			Timothy	Lezon
			Wen-Hsiung	Li
			Wei	LI
			Kelvin	Li
			Hongzhe	Li
			Hongbin	Li
			Chenglong	Li
			Menglong	Li
			Jing	Li
			Jie	Liang
			David	Liberles
			Ran	Libeskind-Hadas
			Judy	Lieberman
			Frederik	Liljeros
			Markus	Lill
			Bing	Lim
			Dawei	Lin
			Erik	Lindahl
			Jennifer	Linden
			Jennifer	Linderman
			Rune	Linding
			Benjamin	Lindner
			Michal	Linial
			Christiane	Linster
			Robert	Lionberger
			Sarah	Lippe
			John	Lisman
			Dene	Littler
			Xiaole	Liu
			Liang	Liu
			Li	Liu
			Jin	Liu
			Dongsheng	Liu
			Tianyun	Liu
			Michael	Livstone
			Joseph	Lizier
			Pierre-Marie	Lledo
			Allen	Lo
			Yonatan	Loewenstein
			Michael	Long
			Mian	Long
			Kit	Longden
			Andre	Longtin
			Patrick	Loria
			Matthew	Lorincz
			Wolfgang	Losert
			Yoram	Louzoun
			J. Christopher	Love
			John	Lowengrub
			Zhiyong	Lu
			Ying	Lu
			Xinghua	Lu
			David	Lubensky
			Fabio	Luciani
			Elliot	Ludvig
			E.	Luebeck
			David	Lukatsky
			Desmond	Lun
			Zewei	Luo
			Javier	Luque
			Nelson Afonso	Lutaif
			Zaida	Luthey-Schulten
			Grant	Lythe
			William	Lytton
			Yuri	Lyubchenko
			Wei Ji	Ma
			Buyong	Ma
			Ralf	Moeller
			Viktor	Möller
			Franz-Josef	Möller
			Avi	Ma'ayan
			Feilim	Mac Gabhann
			David	MacAlpine
			James	MacDonald
			Christian	Machens
			Malcolm	MacIver
			Jakob	Macke
			Susan	Mackem
			Aaron	Mackey
			Margaret	Mackinnon
			Shev	MacNamara
			Aviv	Madar
			Jeffry	Madura
			Carsten	Magnus
			Radhakrishnan	Mahadevan
			Narendra	Maheshri
			Tiago	Maia
			Thomas	Mailund
			Jacek	Majewski
			William	Majoros
			Mary Margot	Maleckar
			Manuel	Malmierca
			Lars	Malmstroem
			Laurence	Maloney
			Ivan	Maly
			Pascal	Mamassian
			D. R.	Mani
			Madhav	Mani
			Paul	Manis
			Huibert	Mansvelder
			Athanasius	Marée
			Miguel	Maravall
			Daniel	Marbach
			Elizabeth	Marchiani
			John	Marioni
			Amos	Maritan
			Alan E	Mark
			Scott	Markel
			Olga	Markova
			Olivier	Marre
			Siewert Jan	Marrink
			Brian	Marsden
			James	Marshall
			Kevan A.C.	Martin
			Joanna	Masel
			Sergei	Maslov
			William	Mather
			German	Mato
			Frederick	Matsen
			John	Mattick
			Sebastian	Maurer-Stroh
			Ali	Mazaheri
			Aurelien	Mazurie
			Mary	McCaffrey
			David	McCamant
			Catherine	McCarty
			James	McCaw
			Alexa	McCray
			Jonathan	McCullers
			Jason	McDermott
			Daniel	McGehee
			Niall	McLoughlin
			Philip	McQueen
			Shannon	McWeeney
			Andrew	Meade
			Ramit	Mehr
			Guenther	Meinhardt
			Hans	Meinhardt
			Markus	Meister
			Giuseppe	Melacini
			Jack	Mellor
			Pedro	Mendes
			Luis	Mendoza
			Eduardo	Mendoza
			Liset	Menendez de la Prida
			Jean-Louis	Mergny
			Stefano	Merler
			Alexey	Merz
			Kenneth	Merz
			Jordi	Mestres
			Mutlu	Mete
			Ralf	Metzler
			Walter	Metzner
			Folker	Meyer
			Michael	Meyer-Hermann
			Jason	Mezey
			George	Michalopoulos
			Cristian	Micheletti
			Paul	Michels
			Stephen	Michnick
			Richard	Michod
			Nicole	Mideo
			Stefan	Mihalas
			Marco	Milan
			Kenneth	Miller
			Dennis	Miller
			Yifat	Miller
			Joel	Miller
			Ron	Milo
			Ali	Minai
			Gabriel	Mindlin
			Pablo	Minguez
			Vladimir	Minin
			Gary	Mirams
			Diego	Miranda-Saavedra
			Claudio	Mirasso
			Leonid	Mirny
			Paul	Mischel
			Bratislav	Misic
			Makedonka	Mitreva
			Sara	Mitri
			Josh	Mitteldorf
			Anthony	Mittermaier
			Takashi	Miura
			Makoto	Miyazaki
			Jeff	Moehlis
			Alex	Mogilner
			Gianluigi	Mongillo
			Nick	Monk
			Rosalyn	Moran
			Silvia	Morante
			Violaine	Moreau
			Ruben	Moreno-Bote
			Kenji	Morita
			Alexandre	Morozov
			Michael	Morrissey
			Ali	Mortazavi
			Alan	Moses
			David	Moss
			Sara	Mostafavi
			Rafal	Mostowy
			Alessandro	Moura
			Richard	Moxley
			Simon	Moxon
			Yuguang	Mu
			Sayan	Mukherjee
			Ranjan	Mukhopadhyay
			Nicola	Mulder
			James	Mullins
			Christopher	Mungall
			Mary	Munson
			T.	Murali
			Todd	Murphey
			Robert	Murphy
			Wendy	Murray
			Arcady	Mushegian
			Georgi	Muskhelishvili
			Ville	Mustonen
			Chad	Myers
			Elena	Nabieva
			Jean-Pierre	Nadal
			Haruki	Nakamura
			Jun	Namikawa
			Sanjiv	Narayan
			Madhusudan	Natarajan
			Saket	Navlakha
			Sven	Nelander
			Israel	Nelken
			Peter	Nelson
			David	Nelson
			James	Nelson
			Theoden	Netoff
			Aurelie	Neveol
			Thomas	Nevian
			Stuart	Newman
			Mark	Newman
			Rod	Nibbe
			Mario	Nicodemi
			Steven	Niederer
			Morten	Nielsen
			Jens	Nielsen
			Hooshang	Nikjoo
			Danko	Nikolic
			Zoran	Nikoloski
			Lennart	Nilsson
			Jeremy	Niven
			Frank	Noé
			Brad	Nolen
			Sergei	Noskov
			Cedric	Notredame
			Peter	Novick
			Thomas	Nowotny
			Matthew	Nugent
			Andy	Oates
			Duncan	Odom
			Thomas	Oertner
			Hiroyuki	Ogata
			Thomas	O'Hara
			Baldomero	Oliva
			Peter	Olofsson
			Zoltan	Oltvai
			Jeff	Omens
			Philip	O'Neill
			José	Onuchic
			Chris	Oostenbrink
			Tudor	Oprea
			J Kevin	O'Regan
			Randall	O'Reilly
			Jill	O'Reilly
			Matej	Oresic
			Michal	Or-Guil
			Brian	O'Rourke
			Modesto	Orozco
			Justin	Ortiz
			Ben	O'Shaughnessy
			Miriam	Osterfield
			Srdjan	Ostojic
			Niels	Otani
			Irene	Otero-Muras
			Sarah	Otto
			Markus	Owen
			Ertugrul	Ozbudak
			Mahmut	Ozer
			S.	Ozkan
			Jorge	Pacheco
			Katrin	Paeschke
			Dinesh	Pai
			Sinisa	Pajevic
			Gergely	Palla
			Thomas	Palmeri
			Bernhard	Palsson
			Timothy	Palzkill
			Karthik	Panchanathan
			Anna R	Panchenko
			Gaurav	Pandey
			Alessandro	Pandini
			Yuan-Ping	Pang
			Liam	Paninski
			Stefano	Panzeri
			Christos	Papadimitriou
			Elena	Papaleo
			Dmitri	Papatsenko
			Roger	Papke
			Rohit	Pappu
			Néstor	Parga
			J Thomas	Parsons
			Richard	Pastor
			Kiran	Patil
			Mary Elizabeth	Patti
			Johan	Paulsson
			Paul	Pavlidis
			Juan Manuel	Pedraza
			Dana	Pe'er
			Jimin	Pei
			Shayn	Peirce-Cottler
			Lorenzo	Pellis
			Matjaz	Perc
			Alan	Perelson
			Daniel	Perez
			Jose Luis	Perez Velazquez
			Edward	Perkins
			Theodore	Perkins
			Robert	Peterka
			Steven	Petersen
			Ion	Petre
			Jim	Pfaendtner
			Jean-Pascal	Pfister
			George	Phillips
			Ernesto	Picardi
			Satish	Pillai
			Ramesh	Pillai
			Jonathan	Pillow
			Zachary	Pincus
			John	Pinney
			Reynaldo	Pinto
			Helen	Piontkivska
			Gordon	Pipa
			Conrad	Plake
			Panayiota	Poirazi
			Daniel	Polani
			Jitka	Polechova
			Philip	Polgreen
			Thomas D.	Pollard
			Ana	Pombo
			Joseph	Pomerening
			Andrew	Pomiankowski
			Art	Poon
			Maria	Poptsova
			J. David	Port
			Markus	Porto
			Bruno	Poucet
			Alexandre	Pouget
			Babak	Pourbohloul
			Nataša	Pržulj
			Ken	Prehoda
			Daniel	Pressnitzer
			Robert	Prill
			Sharon	Prince
			Astrid	Prinz
			F.W.	Prinzen
			Jonathan	Pritchard
			Thomas	Proft
			Daniel	Promislow
			Addy	Pross
			William	Pu
			Jose	Puglisi
			Tal	Pupko
			Dale	Purves
			Xiayang	Qiu
			Amina	Qutub
			Jörg	Rösgen
			Raul	Rabadan
			Joshua	Rabinowitz
			Owen	Rackham
			Predrag	Radivojac
			Tomas	Radivoyevitch
			Jeroen	Raes
			Gunnar	Raetsch
			Susanne	Rafelski
			Jörg	Rahnenführer
			Vijay	Rajagopal
			Karthik	Raman
			Andrew	Rambaut
			Doraiswami	Ramkrishna
			David	Rand
			Rajiv	Ranganathan
			Antonio	Rangel
			Francesco	Rao
			Ben	Raphael
			Benjamin	Rapoport
			Wouter-Jan	Rappel
			Matthew	Rasmussen
			William	Ratcliff
			Oliver	Ratmann
			Erzsebet	Ravasz
			Animesh	Ray
			Stuart	Ray
			Soumya	Raychaudhuri
			Jason	Raymond
			Heather	Read
			Dietrich	Rebholz-Schuhmann
			Pedro	Reche
			Mario	Recker
			Benjamin	Redelings
			A David	Redish
			Jennifer	Reed
			Gregory	Reeves
			Roland	Regoes
			Marc	Rehmsmeier
			Jaques	Reifman
			Ramon	Reig
			Mark	Reimers
			Pamela	Reinagel
			Cynthia	Reinhart-King
			John	Reinitz
			David	Reinkensmeyer
			Timothy	Reluga
			Justin	Remais
			Michiel	Remme
			Alfonso	Renart
			Robert	Rentzsch
			Alex	Reyes
			Anna-Louise	Reysenbach
			Enrico	Rezende
			Ruy	Ribeiro
			Blake	Richards
			Magnus	Richardson
			Jane	Richardson
			Hermann	Riecke
			William	Riehl
			Jorge	Riera
			Daniel	Rigden
			Steven	Riley
			Dario	Ringach
			Petra	Ritter
			Art	Roberts
			Tom	Robertson
			David	Robertson
			Peter	Robinson
			Hugh	Robinson
			Keith	Robison
			Julie	Robotham
			Matthew	Rockman
			Blanca	Rodriguez
			Ingo	Roeder
			Jochen	Roeper
			Jim	Rogers
			Igor	Rogozin
			Pejman	Rohani
			Gustavo	Rohde
			Remo	Rohs
			Darin	Rokyta
			Bernhard	Ronacher
			Peter	Roper
			Angelo	Rosa
			Simona	Rossi
			Frederick	Roth
			Arnd	Roth
			Stefan	Rotter
			Yasser	Roudi
			Benoit	Roux
			Igor	Rouzine
			Alex	Roxin
			Leonid	Rubchinsky
			Jonathan	Rubin
			Mikail	Rubinov
			Boris	Rubinstein
			Oscar	Rueda
			Peter	Ruoff
			Eytan	Ruppin
			Colin	Russell
			Michael	Russelll
			Michael	Rust
			Alan	Ruttenberg
			Marie	Somon
			David	Saakian
			Marwan	Sabbagh
			Frederick	Sachs
			Karen	Sachs
			Roberto	Saenz
			Julio	Saez-Rodriguez
			Yumiko	Saga
			S.	Sahinalp
			Gerald	Saidel
			Valdur	Saks
			Dennis R.	Salahub
			Isaac	Salazar-Ciudad
			Julian	Sale
			Kourosh	Salehi-Ashtiani
			Andrej	Sali
			Freddie	Salsbury, Jr
			Merijn	Salverda
			Steven	Salzberg
			Giovanni	Samaey
			Karissa	Sanbonmatsu
			Alvaro	Sanchez
			Chris	Sander
			Yves-Henri	Sanejouand
			Fidel	Santamaria
			Vijayalakshmi	Santhakumar
			Francisco	Santos
			Jonathan	Saragosti
			Boris	Sarcevic
			Casim	Sarkar
			Jeffrey	Saucerman
			Herbert	Sauro
			Francesco	Savelli
			Nick	Savill
			Satoshi	Sawai
			Felix	Schürmann
			Alexander	Schütz
			Henry	Schaefer
			Jeffrey	Schall
			Konrad	Scheffler
			Steven	Schiff
			Celia	Schiffer
			Birgit	Schiott
			Tamar	Schlick
			Andreas	Schlicker
			Anita	Schmid
			Oswald	Schmitz
			Ralf	Schneggenburger
			Gisbert	Schneider
			Elad	Schneidman
			Santiago	Schnell
			Birgit	Schoeberl
			Michael	Schroeder
			Ora	Schueler-Furman
			Stefan	Schuster
			Stefan	Schuster
			Russell	Schwartz
			Nicolas	Schweighofer
			Matt	Scott
			Stephen	Scott
			Matthew	Scott
			Timothy	Secomb
			Ronen	Segev
			Daniel	Segré
			Aaron	Seitz
			Terrence	Sejnowski
			Inbal	Sela
			Luc	Selen
			Kumar	Selvarajoo
			Anirvan	Sengupta
			Cathal	Seoighe
			Peggy	Series
			Aswin	Seshasayee
			Anil	Seth
			Alessandro	Sette
			Joshua	Shaevitz
			Nigam	Shah
			Jagesh	Shah
			Imran	Shah
			Vahid	Shahrezaei
			Eugene	Shakhnovich
			Harish	Shankaran
			Robert	Shapley
			Kieran	Sharkey
			Kim	Sharp
			Tatyana	Sharpee
			Ann	Sheehy
			Amarda	Shehu
			M.	Shell
			Adrian	Shepherd
			Arthur	Sherman
			Leming	Shi
			Lei	Shi
			Julia	Shifman
			Eunha	Shim
			Sebastian	Shimeld
			Shigeru	Shinomoto
			Patrick	Shipman
			Jonathon	Shlens
			Michael	Shlesinger
			Tomer	Shlomi
			Ilya	Shmulevich
			Boris	Shraiman
			Indira	Shrivastava
			Stanislav	Shvartsman
			Robert	Siciliano
			Dan	Siegal-Gaskins
			Anne	Siegel
			Hava	Siegelmann
			Gilad	Silberberg
			Jonathan J.	Silberg
			Adelene	Sim
			James	Simmons
			Scott	Simon
			Nicole	Simone
			Jacob	Simonsen
			Thomas	Simonson
			Michael L.	Simpson
			David	Sims
			Ozgur	Simsek
			Mona	Singh
			Saurabh	Sinha
			Marina	Sirota
			Frances	Skinner
			Donna	Slonim
			Nicolas	Sluis-Cremer
			Kieran	Smallbone
			Rod	Smallwood
			Paris	Smaragdis
			Roy	Smeal
			Timo	Smieszek
			Oleg	Smirnov
			Thomas	Smith
			Stephen	Smith
			Maurice	Smith
			Eric	Smith
			Davey	Smith
			Aaron	Smith
			Richard S.	Smith
			David	Smith
			Kim	Sneppen
			Kim	Sneppen
			James	Sneyd
			Venus	So
			Eric	Sobie
			Johannes	Soeding
			Larisa	Soldatova
			Sara	Solla
			Alireza	Soltani
			Fritz	Sommer
			Erik	Sonnhammer
			Alexander	Sorkin
			Albert	Sorribas
			Filipa	Sousa
			Orkun	Soyer
			Saverio	Spagnolie
			Jason	Spence
			Michael	Spratling
			Henning	Sprekeler
			Ranjan	Srivastava
			Peter	Stadler
			Tanja	Stadler
			Kevin J.	Staley
			George	Stan
			Dominic	Standage
			Alexander	Stark
			Andrzej	Stasiak
			Joel	Stavans
			Barry	Stein
			Amelie	Stein
			Ulrich	Stelzl
			Martin	Stemmler
			Klaas Enno	Stephan
			Klaas	Stephan
			Matthew	Stephens
			Greg	Stephens
			David	Sterratt
			Ralf	Steuer
			Charles	Stevens
			Ian	Stevenson
			Christian	Stilp
			Andrea	Stocco
			Maureen	Stolzer
			Eric	Stone
			Mark	Stopfer
			Gisela	Storz
			Daniel	Stouffer
			C.	Stout
			Matthew	Strain
			Sebastiano	Stramaglia
			Cory	Strope
			Joanna	Sulkowska
			Sergei	Sukharev
			Bela	Suki
			Hidenobu	Sumioka
			David	Sumpter
			Sean	Sun
			Eric	Sundberg
			Kaustubh	Supekar
			Mike	Sutcliffe
			Patrick	Suthers
			Valentina	Svicher
			Peter	Swain
			Maciej	Swat
			Nicholas	Swindale
			Eors	Szathmary
			Jan-Willem	Taanman
			Larry	Taber
			Jeffrey	Tabor
			Roberto	Tagliaferri
			Emad	Tajkhorshid
			Mitsunori	Takano
			Can	Tan
			Cheemeng	Tan
			Haixu	Tang
			Chun	Tang
			Jun	Tani
			Emmanuel	Tannenbaum
			Ben	Tatler
			Nicholas	Tatonetti
			Pasi	Tavi
			Dan	Tawfik
			Yvonne	Tay
			Susan	Taylor
			Ronald	Taylor
			Jordan	Taylor
			James	Taylor
			William	Taylor
			Stefan	Tenzer
			David	Terman
			Andrew	Teschendorff
			Tom	Tetzlaff
			Bas	Teusink
			Johannes	Textor
			Gael	Thebaud
			Evangelos	Theodorou
			Frederic	Theunissen
			Rodolphe	Thiebaut
			Ines	Thiele
			William	Thilly
			Jean-Philippe	Thivierge
			David	Thomas
			Julie	Thompson
			Kurt	Thoroughman
			Simon	Thorpe
			Michel	Tibayrenc
			D. Peter	Tieleman
			Elisabeth	Tillier
			Marc	Timme
			Marcus	Tindall
			Itay	Tirosh
			Nico	Tjandra
			Gasper	Tkacik
			Emanuel	Todorov
			Ali	Tofigh
			Emmanuelle	Tognoli
			Ali	Torkamani
			Colin	Torney
			Jonathan	Touboul
			Marc	Toussaint
			Maria Grazia	Tozzi
			Jan	Traas
			Daniel	Tranchina
			Justin	Travis
			Achim	Tresch
			Matthew	Tresch
			Alessandro	Treves
			Jochen	Triesch
			Inaki	Troconiz
			Alex	Tropsha
			Wilson	Truccolo
			Jerry	Tsai
			John	Tsang
			Sophia	Tsoka
			Nikolaos M.	Tsoukias
			Philippos	Tsourkas
			Greg	Tucker-Kellogg
			Katherine	Turner
			Michael	Turvey
			Christopher	Tyler
			John	Tyson
			Hiroki	Ueda
			Igor	Ulitsky
			Shimon	Ullman
			Brigita	Urbanc
			Vladimir	Uversky
			Uwe	Völker
			Sandor	Vajda
			Ilya	Vakser
			Ruben	Valas
			Pedro	Valdes-Sosa
			Alfonso	Valencia
			Giancarlo	Valente
			Mikel	Valle
			David	Vallenet
			Arthur	Van Aerschot
			Minus	van Baalen
			Robert	van Beers
			Rob	van Beers
			Hugo	Van den Berg
			Henk-Jan	van den Ham
			Wiesje	van der Flier
			David	van der Spoel
			Herman	van Haagen
			Peter	Van Haastert
			Sacha	van Hijum
			Egbert	van Nes
			Vera	Van Noort
			Mark	van Rossum
			Ard	van Sighem
			Virginie	van Wassenhove
			Anne-Mieke	Vandamme
			Jeffrey	Varner
			Dimitrios	Vavylonis
			Alexei	Vazquez
			Marko	Vendelin
			Michele	Vendruscolo
			Renée	Ventura-Clapier
			Venessa	Venturi
			Roel	Verhaak
			Gennady	Verkhivker
			Sten	Vermund
			Koen	Vervaeke
			Jean-Baptiste	Veyrieras
			Maria Jesus	Vicent
			Tamas	Vicsek
			Jonathan D.	Victor
			Pierre-Paul	Vidal
			Michael	Vieth
			Nathalie	Viguerie
			Sethu	Vijayakumar
			Dhanasekaran	Vijaykrishna
			Iris	Vilares
			Pablo	Villoslada
			Tomas	Vinar
			Martin	Vingron
			Kalyan	Vinnakota
			Saraswathi	Vishveshwara
			Rosella	Visintin
			Hans	Vogel
			Tim	Vogels
			Joshua	Vogelstein
			Benjamin	Voight
			Erik	Volz
			Gunnar	von Heijne
			Christian	von Mering
			Gregory	Voth
			Vladana	Vukojevic
			Gunter	Wachtershauser
			Rebecca	Wade
			Johan	Wagemans
			Andreas	Wagner
			Steffen	Waldherr
			Jacco	Wallinga
			Angela	Wandinger-Ness
			Zhong	Wang
			Y	Wang
			Liming	Wang
			Jun	Wang
			Edwin	Wang
			Lin	Wang
			Jin	Wang
			Jianxin	Wang
			Jin	Wang
			Robin	Waples
			Michael	Ward
			Joanna	Wares
			Arieh	Warshel
			Michael	Washburn
			Tsjerk	Wassenaar
			Robert	Waterhouse
			Sarah	Waters
			Michael	Waters
			Katrina	Waters
			Donna	Webb
			Bruno	Weber
			Gareth	Weedall
			Wang	Wei
			Guanghong	Wei
			Kunlin	Wei
			Martin	Weigert
			Martin	Weigt
			Cornelis	Weijer
			Leor	Weinberger
			Daniel	Weinreich
			Matthias	Weiss
			Joshua	Weitz
			Matthew	Welch
			Erik	Welf
			William	Welsh
			Carter	Wendelken
			Zhiping	Weng
			Thomas	Werner
			Lorenz	Wernisch
			Joel	Wertheim
			David	Westhead
			Sarah	Wheelan
			Peter	White
			Tom	Whitington
			Jeff	Wickens
			Jim	Wielaard
			Brian	Wilhelm
			James	Willerson
			Amy	Williams
			Ian	Wilson
			Michael	Wilson
			Alan	Wing
			Ned	Wingreen
			Georg	Winterer
			Daniela	Witten
			Gayle	Wittenberg
			Shoshana	Wodak
			Dominik	Wodarz
			Florentin	Woergoetter
			Dana	Wohlbach
			John	Wolf
			Jochen	Wolf
			Yuri	Wolf
			Charles	Wolgemuth
			Olaf	Wolkenhauer
			Ka-Chun	Wong
			Chung	Wong
			KongFatt	Wong-Lin
			Valerie	Wood
			James	Wood
			Melanie	Woodin
			Nancy	Woolf
			Bradly	Wouters
			Jeffrey	Wrana
			Naomi	Wray
			Paul	Wrede
			James	Wright
			Rongling	Wu
			Hulin	Wu
			Fan	Wu
			Min	Wu
			Stefan	Wuchty
			Joao	Xavier
			Lei	Xie
			Yi	Xing
			Yuan	Xiong
			Yechun	Xu
			Jun	Yan
			Brian	Yandell
			Ziheng	Yang
			Xiaohan	Yang
			Wei	Yang
			Krassimir	Yankulov
			Chen	Yanover
			Xuebiao	Yao
			Lixia	Yao
			Yosi	Yarom
			James	Yates
			Andrew	Yates
			Arash	Yazdanbakhsh
			Yuzhen	Ye
			Jonathan	Yewdell
			John	Yin
			Nir	Yosef
			Lingchong	You
			Jamey	Young
			Haiyuan	Yu
			Yu	Yuguo
			Péter	Závodszky
			Frank	Zaal
			Anthony	Zador
			Osvaldo	Zagordi
			Bojan	Zagrovic
			Qasim	Zaidi
			Andrew	Zalesky
			Muhammad	Zaman
			Julian	Zappala
			Mihaela	Zavolan
			Maurizio	Zazzi
			Jochen	Zeil
			Konstantin	Zeldovich
			Alexander	Zelikovsky
			An-Ping	Zeng
			Qiang	Zhang
			Kechen	Zhang
			Jun	Zhang
			Jianyi	Zhang
			Hai-Tao	Zhang
			Bing	Zhang
			Hang	Zhang
			Li	Zhaoping
			Andrey	Zharkikh
			Xiaoming	Zheng
			Wenjun	Zheng
			W.Z.	Zhong
			Huan-Xiang	Zhou
			Huan-Xiang	Zhou
			Hongyi	Zhou
			Tong	Zhou
			Ruhong	Zhou
			Guo-Ping	Zhou
			Xin-Guang	Zhu
			Cheng	Zhu
			Qiang	Zhu
			Andrei	Zinovyev
			Giovanni	Zocchi
			Michal	Zochowski
			Jeremy	Zucker
			Craig	Zwickl
